# Supplementary material for: Potential Herb–Drug Interactions in the Management of Age-Related Cognitive Dysfunction
Source: Pharmaceutics. 2021 Jan 19;13(1):124. doi: 10.3390/pharmaceutics13010124 (PMC7835864; doi:10.3390/pharmaceutics13010124)
Supplement: Supplementary file 1 [file pharmaceutics-13-00124-s001.pdf]

# Supplementary Materials: Potential Herb–Drug Interactions in the Management of Age-Related Cognitive Dysfunction

Maria D. Auxtero, Susana Chalante, Mário R. Abade, Rui Jorge and Ana I. Fernandes

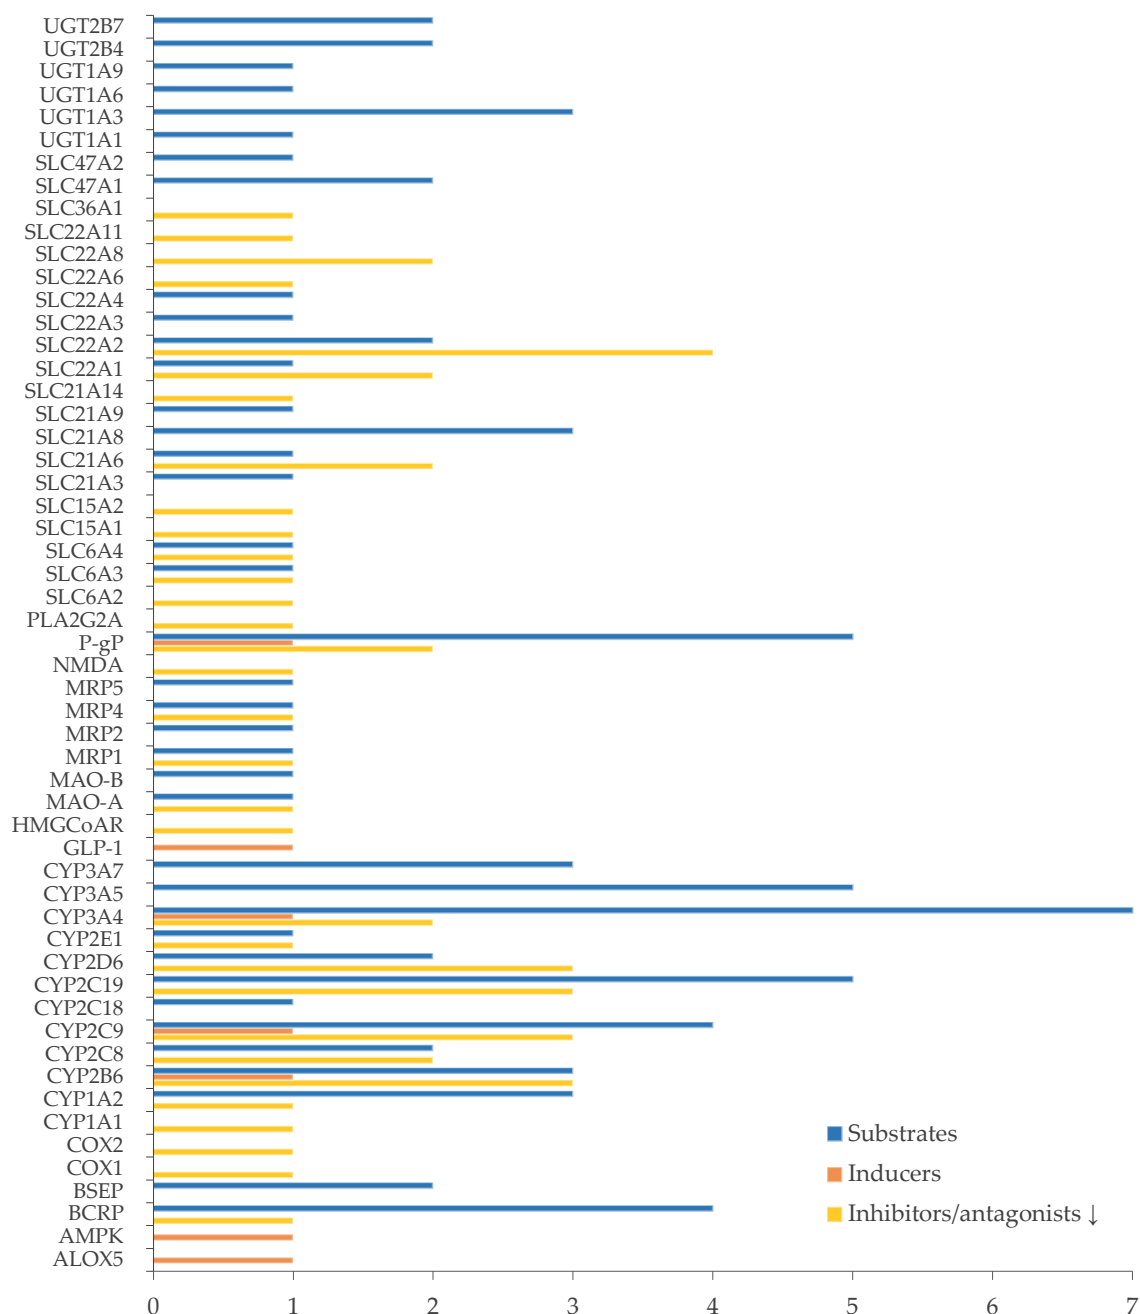

**Figure S1.** Number of drugs interacting with the different targets (enzymes, transporters and receptors) as substrates, inducers/upregulators and inhibitors/downregulators/antagonists.

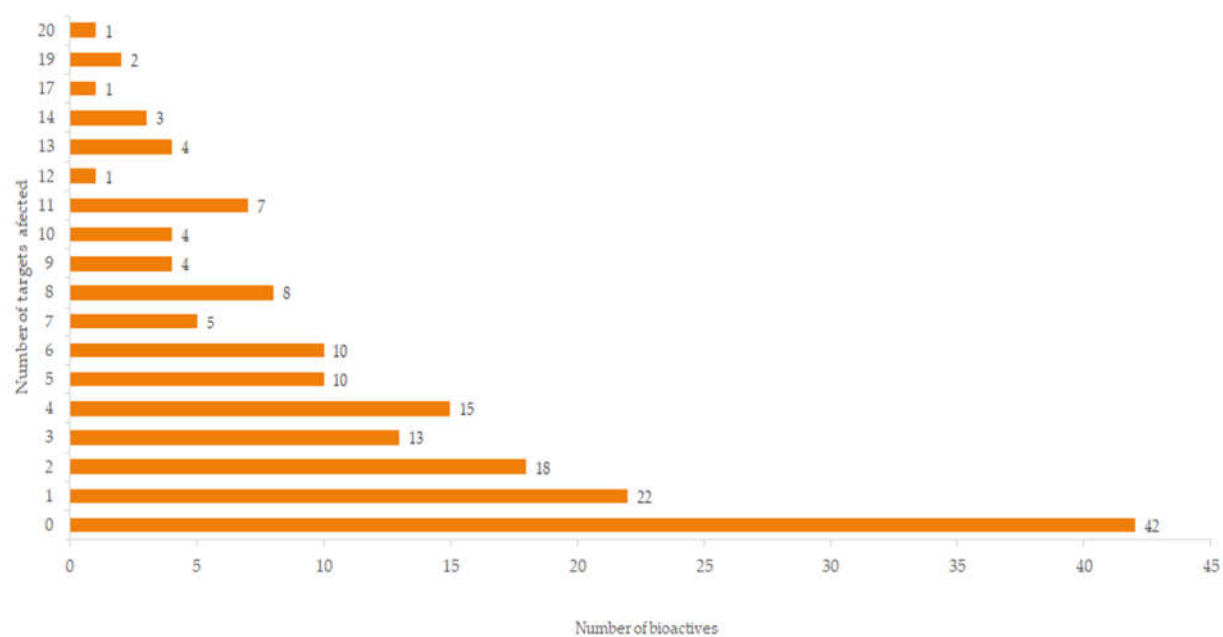

**Figure S2.** Frequency of target modulation by bioactives, as a measure of HDI potential.
